# Supplementary material
Source: publisher figshare collection journal article supplement (https://sage.figshare.com/ndownloader/files/17059418)
Supplement: Supplementary file 1 [file 17059418]

## I. Relational Uncertainty (Knobloch & Solomon, 1999)

*The following questions will be used to measure relational uncertainty*

*In the following section, we have listed a number of statements addressing different facets of involvement in dating relationships. We would like you to rate how CERTAIN you are about the degree of involvement that you have in your romantic relationship.*

**Please note: We are not asking you to rate how much involvement there is in your dating relationship, but rather how certain you are about whatever degree of involvement you perceive. It might help you first consider how much each form of involvement is present in your dating relationship, and then evaluate how certain you are about that perception.**

*For these judgments you should use the following scale:*

| 1                                                  | 2                   | 3                     | 4       | 5                   | 6                 | 7                                                |
|----------------------------------------------------|---------------------|-----------------------|---------|---------------------|-------------------|--------------------------------------------------|
| COMPLETELY<br>OR ALMOST<br>COMPLETELY<br>UNCERTAIN | MOSTLY<br>UNCERTAIN | SOMEWHAT<br>UNCERTAIN | NEUTRAL | SOMEWHAT<br>CERTAIN | MOSTLY<br>CERTAIN | COMPLETELY<br>OR ALMOST<br>COMPLETELY<br>CERTAIN |

*We would like to know how certain you are about YOUR OWN INVOLVEMENT in your relationship.*

### HOW CERTAIN ARE YOU ABOUT...

1. Whether or not you want the relationship to work out in the long run?
2. Whether or not you want the relationship to last?
3. How much you like your partner?
4. How important the relationship is to you?
5. How much you are romantically interested in your partner?
6. **Whether or not you are ready to commit to your partner?**

*Next, we would like to know how certain you are about YOUR PARTNER'S INVOLVEMENT in your relationship.*

| 1                                                  | 2                   | 3                     | 4       | 5                   | 6                 | 7                                                |
|----------------------------------------------------|---------------------|-----------------------|---------|---------------------|-------------------|--------------------------------------------------|
| COMPLETELY<br>OR ALMOST<br>COMPLETELY<br>UNCERTAIN | MOSTLY<br>UNCERTAIN | SOMEWHAT<br>UNCERTAIN | NEUTRAL | SOMEWHAT<br>CERTAIN | MOSTLY<br>CERTAIN | COMPLETELY<br>OR ALMOST<br>COMPLETELY<br>CERTAIN |

### HOW CERTAIN ARE YOU ABOUT...

1. Whether or not your partner is ready to commit to you?
2. How committed your partner is to the relationship?

3. Whether or not your partner wants to be with you in the long run?
4. How important the relationship is to your partner?
5. Whether or not your partner wants the relationship to work out in the long run?
- 6. How much your partner is attracted to you?**

*Next, we would like to know how certain you are about facets of YOUR RELATIONSHIP, in general.*

| 1                                                  | 2                   | 3                     | 4       | 5                   | 6                 | 7                                                |
|----------------------------------------------------|---------------------|-----------------------|---------|---------------------|-------------------|--------------------------------------------------|
| COMPLETELY<br>OR ALMOST<br>COMPLETELY<br>UNCERTAIN | MOSTLY<br>UNCERTAIN | SOMEWHAT<br>UNCERTAIN | NEUTRAL | SOMEWHAT<br>CERTAIN | MOSTLY<br>CERTAIN | COMPLETELY<br>OR ALMOST<br>COMPLETELY<br>CERTAIN |

#### HOW CERTAIN ARE YOU ABOUT...

1. Whether or not the relationship will work out in the long run?
2. Whether or not you and your partner feel the same way about each other?
3. Whether or not you and your partner will stay together?
4. Whether or not your relationship is a romantic one?
5. The boundaries for appropriate and/or inappropriate behavior in the relationship?
6. Whether or not your partner likes you as much as you like him/her?
- 7. How you can or cannot behave around your partner?**

\*Note. Bolded items were removed from analysis during EFA.

## II. Network Uncertainty

As you read the statements below, please consider **ONLY** interacting with **your partner's social network** (close friends, family members, peers/coworkers, etc.). As you think about your past, current, and future interactions with your partner's social network, indicate your current level of **CERTAINTY** about the following statements (*1 = COMPLETELY OR ALMOST COMPLETELY UNCERTAIN; 7 = COMPLETELY OR ALMOST COMPLETELY CERTAIN*).

| 1                                                  | 2                   | 3                     | 4       | 5                   | 6                 | 7                                                |
|----------------------------------------------------|---------------------|-----------------------|---------|---------------------|-------------------|--------------------------------------------------|
| COMPLETELY<br>OR ALMOST<br>COMPLETELY<br>UNCERTAIN | MOSTLY<br>UNCERTAIN | SOMEWHAT<br>UNCERTAIN | NEUTRAL | SOMEWHAT<br>CERTAIN | MOSTLY<br>CERTAIN | COMPLETELY<br>OR ALMOST<br>COMPLETELY<br>CERTAIN |

#### HOW CERTAIN ARE YOU THAT...

1. Your partner's social network accepts you as their friend/family member's significant other
2. Your partner's social network approves of the fact that you and your partner are together
3. Your partner's social network acts in a way that displays acceptance of you being in your partner's life

- 4. Your partner's social network purposefully interferes with your relationship**
- 5. Your partner's social network thinks that you are "good enough" for your partner**

HOW CERTAIN ARE YOU THAT...

1. Your partner's social network likes you
- 2. Your partner's social network enjoys spending time with you**
- 3. Your partner's social network has invited you into their social circle**
- 4. Your partner's social network wants to be friends with you**
- 5. Your partner's social network would spend time with you even if your partner was not around**

HOW CERTAIN ARE YOU THAT...

1. Your partner's social network does not make negative judgments about you you are as a person
- 2. Your partner's social network does not hold any of your insecurities against you**
3. Your partner's social network does not talk about you behind your back
4. Your partner's social network does not constantly evaluate you
- 5. Your partner's social network treats you the way that you want to be treated**

HOW CERTAIN ARE YOU THAT...

1. Your partner does not have a romantic connection with any of their social network members
2. Your partner does not have a physical relationship with any of their social network members
3. Your partner's social network members do not encourage them to cheat on you
- 4. Your partner prioritizes you over their social network**
- 5. Your partner's social network does not threaten your relationship in any way**

As you read the items below, please consider ONLY your partner interacting with **your social network** (close friends, family members, peers/coworkers, etc.). As you think about past, current, and future interactions between your partner and your social network, indicate your current level of CERTAINTY about the following statements (*1 = COMPLETELY OR ALMOST COMPLETELY UNCERTAIN; 7 = COMPLETELY OR ALMOST COMPLETELY CERTAIN*).

| 1                                                  | 2                   | 3                     | 4       | 5                   | 6                 | 7                                                |
|----------------------------------------------------|---------------------|-----------------------|---------|---------------------|-------------------|--------------------------------------------------|
| COMPLETELY<br>OR ALMOST<br>COMPLETELY<br>UNCERTAIN | MOSTLY<br>UNCERTAIN | SOMEWHAT<br>UNCERTAIN | NEUTRAL | SOMEWHAT<br>CERTAIN | MOSTLY<br>CERTAIN | COMPLETELY<br>OR ALMOST<br>COMPLETELY<br>CERTAIN |

HOW CERTAIN ARE YOU THAT...

- 1. Your social network accepts your partner as your significant other**
- 2. Your social network approves of the fact that you are with your current partner**

**3. Your social network acts in a way that displays acceptance of your partner being in your life**

4. Your social network might purposefully interfere with your relationship

5. Your social network thinks that your partner is “good enough” for you

HOW CERTAIN ARE YOU THAT...

**1. Your social network likes your partner**

**2. Your social network enjoys spending time with your partner**

3. Your social network has welcomed your partner into your social circle

4. Your social network wants to be friends with your partner

**5. Your social network would spend time with your partner even if you were not around**

HOW CERTAIN ARE YOU THAT...

**1. Your partner is not jealous of the relationship that you have with any of your social network members**

**2. Your partner trusts you not to cheat on them with anyone from your social network**

**3. Your partner has no problem with you hanging around any of your social network members when you are not around**

4. Your partner does not feel threatened by any of your network members

5. Your partner does not get angry when you spend time with your social network members

HOW CERTAIN ARE YOU THAT...

**1. You can balance spending time with your partner vs. spending time with your social network**

**2. You can pay attention to the needs of your partner as well as the members of your social network**

3. You never have to "choose" between your partner or your network members

**4. The amount of time that you spend with your partner does not influence the relationship(s) you have with your social network**

5. The amount of time that you spend with your social network member(s) does not influence the relationship that you have with your partner

\*Note. Bolded items were removed from analysis during EFA.

### **III. Partner Interdependence (Solomon & Knobloch, 2004)**

In this next section, we are interested in understanding the ways in which the relationship that you share with the person in question affects your every day behavior. Said differently, we are curious about the ways that this relational partner influences your everyday behavior. On the scale below please indicate the degree to which you AGREE OR DISAGREE with the below prompts (1 = STRONGLY DISAGREE 7 = STRONGLY AGREE)

|                      |          |                      |         |                   |       |                   |
|----------------------|----------|----------------------|---------|-------------------|-------|-------------------|
| 1                    | 2        | 3                    | 4       | 5                 | 6     | 7                 |
| STRONGLY<br>DISAGREE | DISAGREE | SOMEWHAT<br>DISAGREE | NEUTRAL | SOMEWHAT<br>AGREE | AGREE | STRONGLY<br>AGREE |

1. This person influences the amount of time I spend with my friends
- 2. I am very committed to maintain this relationship**
3. This person interferes with whether I achieve the everyday goals I set for myself
4. This person helps me in my efforts to make plans
- 5. This relationship is very important to me**
- 6. I would make a great effort to maintain my relationship with this person**
7. This person influences how much time I devote to my school work
8. This person interferes with the amount of time I spend with my friends
9. This person helps me to do the things I need to do each day
- 10. I do not expect this relationship to last very long**
11. This person influences whether I achieve the everyday goals I set for myself
12. This person interferes with my ability to use my time well
13. This person helps me in my efforts to spend time with my friends
- 14. I would like this relationship to last a lifetime**
- 15. I am attached to my partner**
- 16. I am committed to my relationship**
17. This person influences my ability to use my time well
18. This person interferes with how much time I devote to my school/work
19. This person helps me to achieve the everyday goals I set for myself
- 20. I am likely to end my relationship in the near future**
21. This person influences whether I do the things I need to do each day
22. This person interferes with the things I need to do each day
23. This person helps me to use my time well

\*Note. Bolded items were removed from analysis during EFA.

#### IV. Intimacy Scale (Rubin, 1970)

*Please circle the number that indicates how you feel about each statement.*

|                      |          |                      |         |                   |       |                   |
|----------------------|----------|----------------------|---------|-------------------|-------|-------------------|
| 1                    | 2        | 3                    | 4       | 5                 | 6     | 7                 |
| STRONGLY<br>DISAGREE | DISAGREE | SOMEWHAT<br>DISAGREE | NEUTRAL | SOMEWHAT<br>AGREE | AGREE | STRONGLY<br>AGREE |

1. I feel that I could confide in my partner about virtually everything..... 1 2 3 4 5 6 7
2. I would do anything for my partner..... 1 2 3 4 5 6 7
3. If I couldn't be with my partner, I would feel miserable..... 1 2 3 4 5 6 7
4. If I am lonely, my first thought is to seek my partner out..... 1 2 3 4 5 6 7
5. One of my primary concerns is my partner's welfare..... 1 2 3 4 5 6 7

6. I would forgive my partner for practically anything..... 1 2 3 4 5 6 7
7. I feel responsible for my partner's well being.....1 2 3 4 5 6 7
8. I would enjoy being confided in by my partner..... 1 2 3 4 5 6 7
9. It would be hard for me to get along without my partner..... 1 2 3 4 5 6 7

#### **V. Satisfaction Scale** (Rusbult, et al., 1998)

*Please indicate your agreement with the following statements as they pertain to your current romantic relationship.*

| 1                    | 2        | 3                    | 4       | 5                 | 6     | 7                 |
|----------------------|----------|----------------------|---------|-------------------|-------|-------------------|
| STRONGLY<br>DISAGREE | DISAGREE | SOMEWHAT<br>DISAGREE | NEUTRAL | SOMEWHAT<br>AGREE | AGREE | STRONGLY<br>AGREE |

1. I feel satisfied with our relationship..... 1 2 3 4 5 6 7
2. My relationship is much better than others' relationships..... 1 2 3 4 5 6 7
3. My relationship is close to ideal..... 1 2 3 4 5 6 7
4. Our relationship makes me very happy..... 1 2 3 4 5 6 7
5. Our relationship does a good job of fulfilling my needs..... 1 2 3 4 5 6 7
